# Supplementary material for: Creutzfeldt-Jakob Disease Incidence, South Korea, 2001–2019
Source: PubMed Central journal article supplement (PMC9423913; doi:10.3201/eid2809.212050), 2022-09
Supplement: 21-2050-Techapp-s1.pdf [file 21-2050-Techapp-s1.pdf]

# Creutzfeldt-Jakob Disease Incidence, South Korea, 2001–2019

## Appendix

**Appendix Table 1.** Classification of germline mutations of familial Creutzfeldt-Jakob disease, South Korea, 2008–2019

| Year      | Total, no. (%) | Mutation, no. (%) |            |            |          |           |
|-----------|----------------|-------------------|------------|------------|----------|-----------|
|           |                | D178N-M129V       | V180I      | E200K      | V203I    | M232R     |
| 2008–2010 | 4 (12.90)      | 0                 | 1 (25)     | 1 (25)     | 1 (25)   | 1 (25)    |
| 2011–2015 | 12 (38.71)     | 1 (8.33)          | 5 (41.67)  | 6 (50)     | 0        | 0         |
| 2016–2019 | 15 (48.39)     | 0                 | 5 (33.33)  | 4 (26.67)  | 0        | 6 (40)    |
| Total     | 31 (100)       | 1 (3.23)          | 11 (35.48) | 11 (35.48) | 1 (3.23) | 7 (22.58) |

**Appendix Table 2.** Annual number of Creutzfeldt-Jakob disease cases by age group, South Korea, 2011–2019

| Year  | Total, no. (%) | Age group, y; no. (%) |           |            |             |             | p value       |
|-------|----------------|-----------------------|-----------|------------|-------------|-------------|---------------|
|       |                | 30–39                 | 40–49     | 50–59      | 60–69       | >70         |               |
| 2011  | 29 (7.36)      | 0                     | 5 (17.24) | 3 (10.34)  | 14 (48.28)  | 7 (24.14)   | <b>0.0307</b> |
| 2012  | 45 (11.42)     | 2 (4.44)              | 2 (4.44)  | 9 (20)     | 13 (28.89)  | 19 (42.22)  | 0.5733        |
| 2013  | 34 (8.63)      | 1 (2.94)              | 2 (5.88)  | 6 (17.65)  | 10 (29.41)  | 15 (44.12)  | 0.9342        |
| 2014  | 65 (16.5)      | 0                     | 2 (3.08)  | 16 (24.62) | 18 (27.69)  | 29 (44.62)  | 0.5429        |
| 2015  | 33 (8.38)      | 0                     | 0         | 5 (15.15)  | 14 (42.42)  | 14 (42.42)  | 0.4847        |
| 2016  | 43 (10.91)     | 0                     | 4 (9.3)   | 8 (18.6)   | 10 (23.26)  | 21 (48.84)  | 0.5660        |
| 2017  | 38 (9.64)      | 0                     | 2 (5.26)  | 9 (23.68)  | 11 (28.95)  | 16 (42.11)  | 0.9022        |
| 2018  | 54 (13.71)     | 1 (1.85)              | 3 (5.56)  | 10 (16.67) | 20 (35.19)  | 20 (38.89)  | 0.9640        |
| 2019  | 53 (13.45)     | 1 (1.89)              | 3 (5.66)  | 9 (16.98)  | 19 (35.85)  | 21 (39.62)  | 0.9823        |
| Total | 394 (100)      | 5 (1.27)              | 23 (5.84) | 75 (19.04) | 129 (32.74) | 162 (41.12) | –             |

\*Bold text indicates statistical significance (p<0.05). –, not applicable.

**Appendix Table 3.** Annual number of Creutzfeldt-Jakob disease cases by city and province, South Korea, 2011–2019

| Year   | Total, no.          |                      |                     |                     |                     |                     |                     |                     |                   |                       |                     |                     |                     |                     |                     |                     |                     |                   |
|--------|---------------------|----------------------|---------------------|---------------------|---------------------|---------------------|---------------------|---------------------|-------------------|-----------------------|---------------------|---------------------|---------------------|---------------------|---------------------|---------------------|---------------------|-------------------|
|        | (%)                 | Seoul                | Busan               | Daegu               | Incheon             | Gwanju              | Daejeon             | Ulsan               | Sejong            | Gyeonggi              | Gangwon             | Chungbuk            | Chungnam            | Jeonbuk             | Jeonnam             | Gyeongbuk           | Gyeongnam           | Jeju              |
| 2011   | 29 (7.36)           | 7 (24.14)            | 0                   | 4 (13.79)           | 3 (10.34)           | 1 (3.45)            | 1 (3.45)            | 0                   | 0                 | 7 (24.14)             | 1 (3.45)            | 0                   | 2 (6.9)             | 1 (3.45)            | 1 (3.45)            | 0                   | 0                   | 1 (3.45)          |
| 2012   | 45 (11.42)          | 9 (20)               | 2 (4.44)            | 3 (6.67)            | 1 (2.22)            | 2 (4.44)            | 2 (4.44)            | 1 (2.22)            | 0                 | 10 (22.22)            | 3 (6.67)            | 1 (2.22)            | 4 (8.89)            | 3 (6.67)            | 2 (4.44)            | 0                   | 2 (4.44)            | 0                 |
| 2013   | 34 (8.63)           | 7 (20.59)            | 4 (11.76)           | 5 (14.71)           | 1 (2.94)            | 1 (2.94)            | 1 (2.94)            | 1 (2.94)            | 0                 | 1 (2.94)              | 1 (2.94)            | 1 (2.94)            | 4 (11.76)           | 1 (2.94)            | 1 (2.94)            | 3 (8.82)            | 2 (5.88)            | 0                 |
| 2014   | 65 (16.5)           | 12 (18.46)           | 2 (3.08)            | 3 (4.62)            | 3 (4.62)            | 0                   | 2 (3.08)            | 1 (1.54)            | 0                 | 15 (23.08)            | 2 (3.08)            | 3 (4.62)            | 6 (9.23)            | 1 (1.54)            | 1 (1.54)            | 9 (13.85)           | 5 (7.69)            | 0                 |
| 2015   | 33 (8.38)           | 5 (15.15)            | 4 (12.12)           | 2 (6.06)            | 1 (3.03)            | 0                   | 1 (3.03)            | 0                   | 0                 | 8 (24.24)             | 3 (9.09)            | 0                   | 1 (3.03)            | 2 (6.06)            | 2 (6.06)            | 1 (3.03)            | 2 (6.06)            | 1 (3.03)          |
| 2016   | 43 (10.91)          | 13 (30.23)           | 3 (6.98)            | 3 (6.98)            | 3 (6.98)            | 1 (2.33)            | 1 (2.33)            | 1 (2.33)            | 1 (2.33)          | 8 (18.6)              | 0                   | 1 (2.33)            | 3 (6.98)            | 2 (4.65)            | 0                   | 1 (2.33)            | 2 (4.65)            | 0                 |
| 2017   | 38 (9.64)           | 10 (26.32)           | 3 (7.89)            | 2 (5.26)            | 1 (2.63)            | 2 (5.26)            | 1 (2.63)            | 0                   | 1 (2.63)          | 8 (21.05)             | 1 (2.63)            | 2 (5.26)            | 1 (2.63)            | 0                   | 1 (2.63)            | 2 (5.26)            | 3 (7.89)            | 0                 |
| 2018   | 54 (13.71)          | 12 (22.22)           | 5 (9.26)            | 2 (3.7)             | 1 (1.85)            | 0                   | 1 (1.85)            | 3 (5.56)            | 0                 | 14 (25.93)            | 2 (3.7)             | 0                   | 2 (3.7)             | 3 (5.56)            | 0                   | 4 (7.41)            | 5 (9.26)            | 0                 |
| 2019   | 53 (13.45)          | 8 (15.09)            | 2 (3.77)            | 1 (1.89)            | 2 (3.77)            | 1 (1.89)            | 3 (5.66)            | 0                   | 0                 | 17 (32.08)            | 2 (3.77)            | 2 (3.77)            | 0                   | 5 (9.43)            | 4 (7.55)            | 4 (7.55)            | 2 (3.77)            | 0                 |
| Total† | 394 (100)           | 83 (21.07)           | 25 (6.35)           | 25 (6.35)           | 16 (4.06)           | 8 (2.03)            | 13 (3.3)            | 7 (1.78)            | 2 (0.51)          | 88 (22.34)            | 15 (3.81)           | 10 (2.54)           | 23 (5.84)           | 18 (4.57)           | 12 (3.05)           | 24 (6.09)           | 23 (5.84)           | 2 (0.51)          |
| Pop‡   | 50,913,333<br>(100) | 9,887,778<br>(19.42) | 3,438,000<br>(6.75) | 2,464,889<br>(4.84) | 2,870,889<br>(5.64) | 1,500,556<br>(2.95) | 1,533,222<br>(3.01) | 1,146,111<br>(2.25) | 186,000<br>(0.37) | 12,476,111<br>(24.50) | 1,512,778<br>(2.97) | 1,587,222<br>(3.12) | 2,116,778<br>(4.16) | 1,822,000<br>(3.58) | 1,787,778<br>(3.51) | 2,667,556<br>(5.24) | 3,312,000<br>(6.51) | 603,667<br>(1.19) |

\*Pop, population.

†Total number of patients during 2011–2019.

‡The average population per year and city, province, and country.

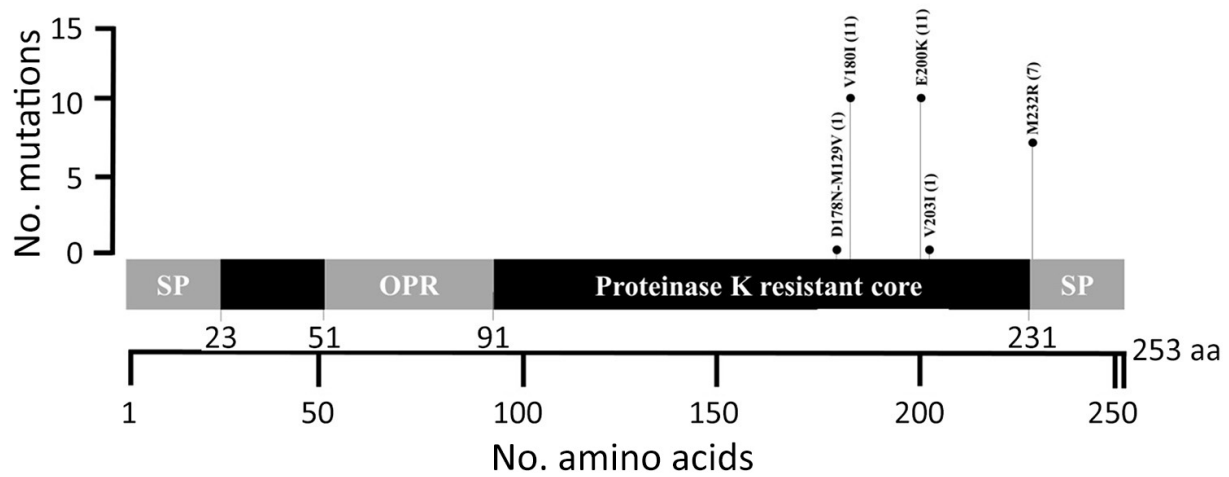

**Appendix Figure 1.** Schematic map of the human prion protein (PrP) with germline mutations of the prion protein gene (*PRNP*) found in familial Creutzfeldt-Jakob disease patients, South Korea, 2001–2019. Parentheses indicate the number of patients carrying each germline mutation. OPR, octapeptide repeat region; SP, signal peptide.

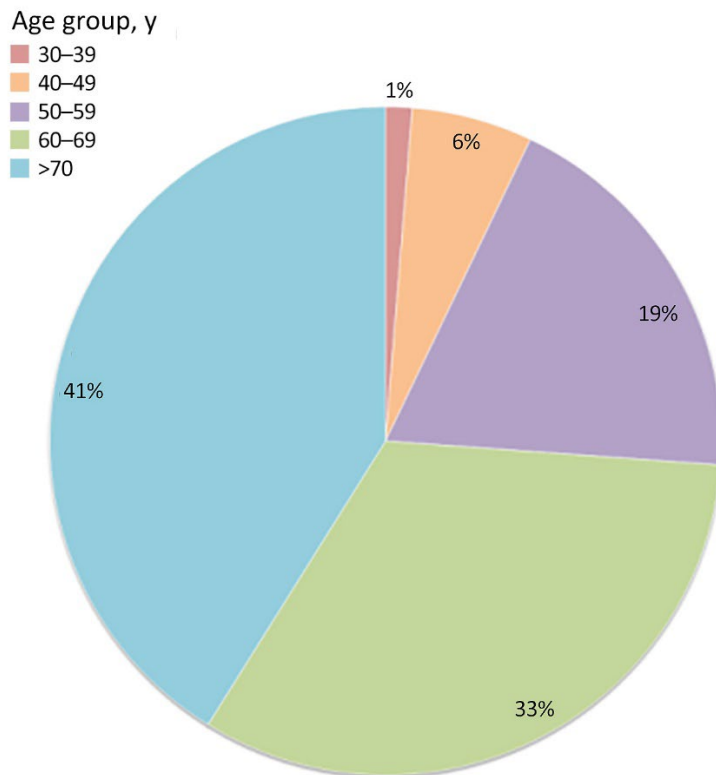

**Appendix Figure 2.** Distribution of Creutzfeldt-Jakob disease cases by age group, South Korea, 2001–2019.
